# Supplementary material for: Membrane Topological Model of Glycosyltransferases of the GT-C Superfamily
Source: PubMed Central journal article supplement (PMC6801728; doi:10.3390/ijms20194842), 2019-09-29

# A: STT3

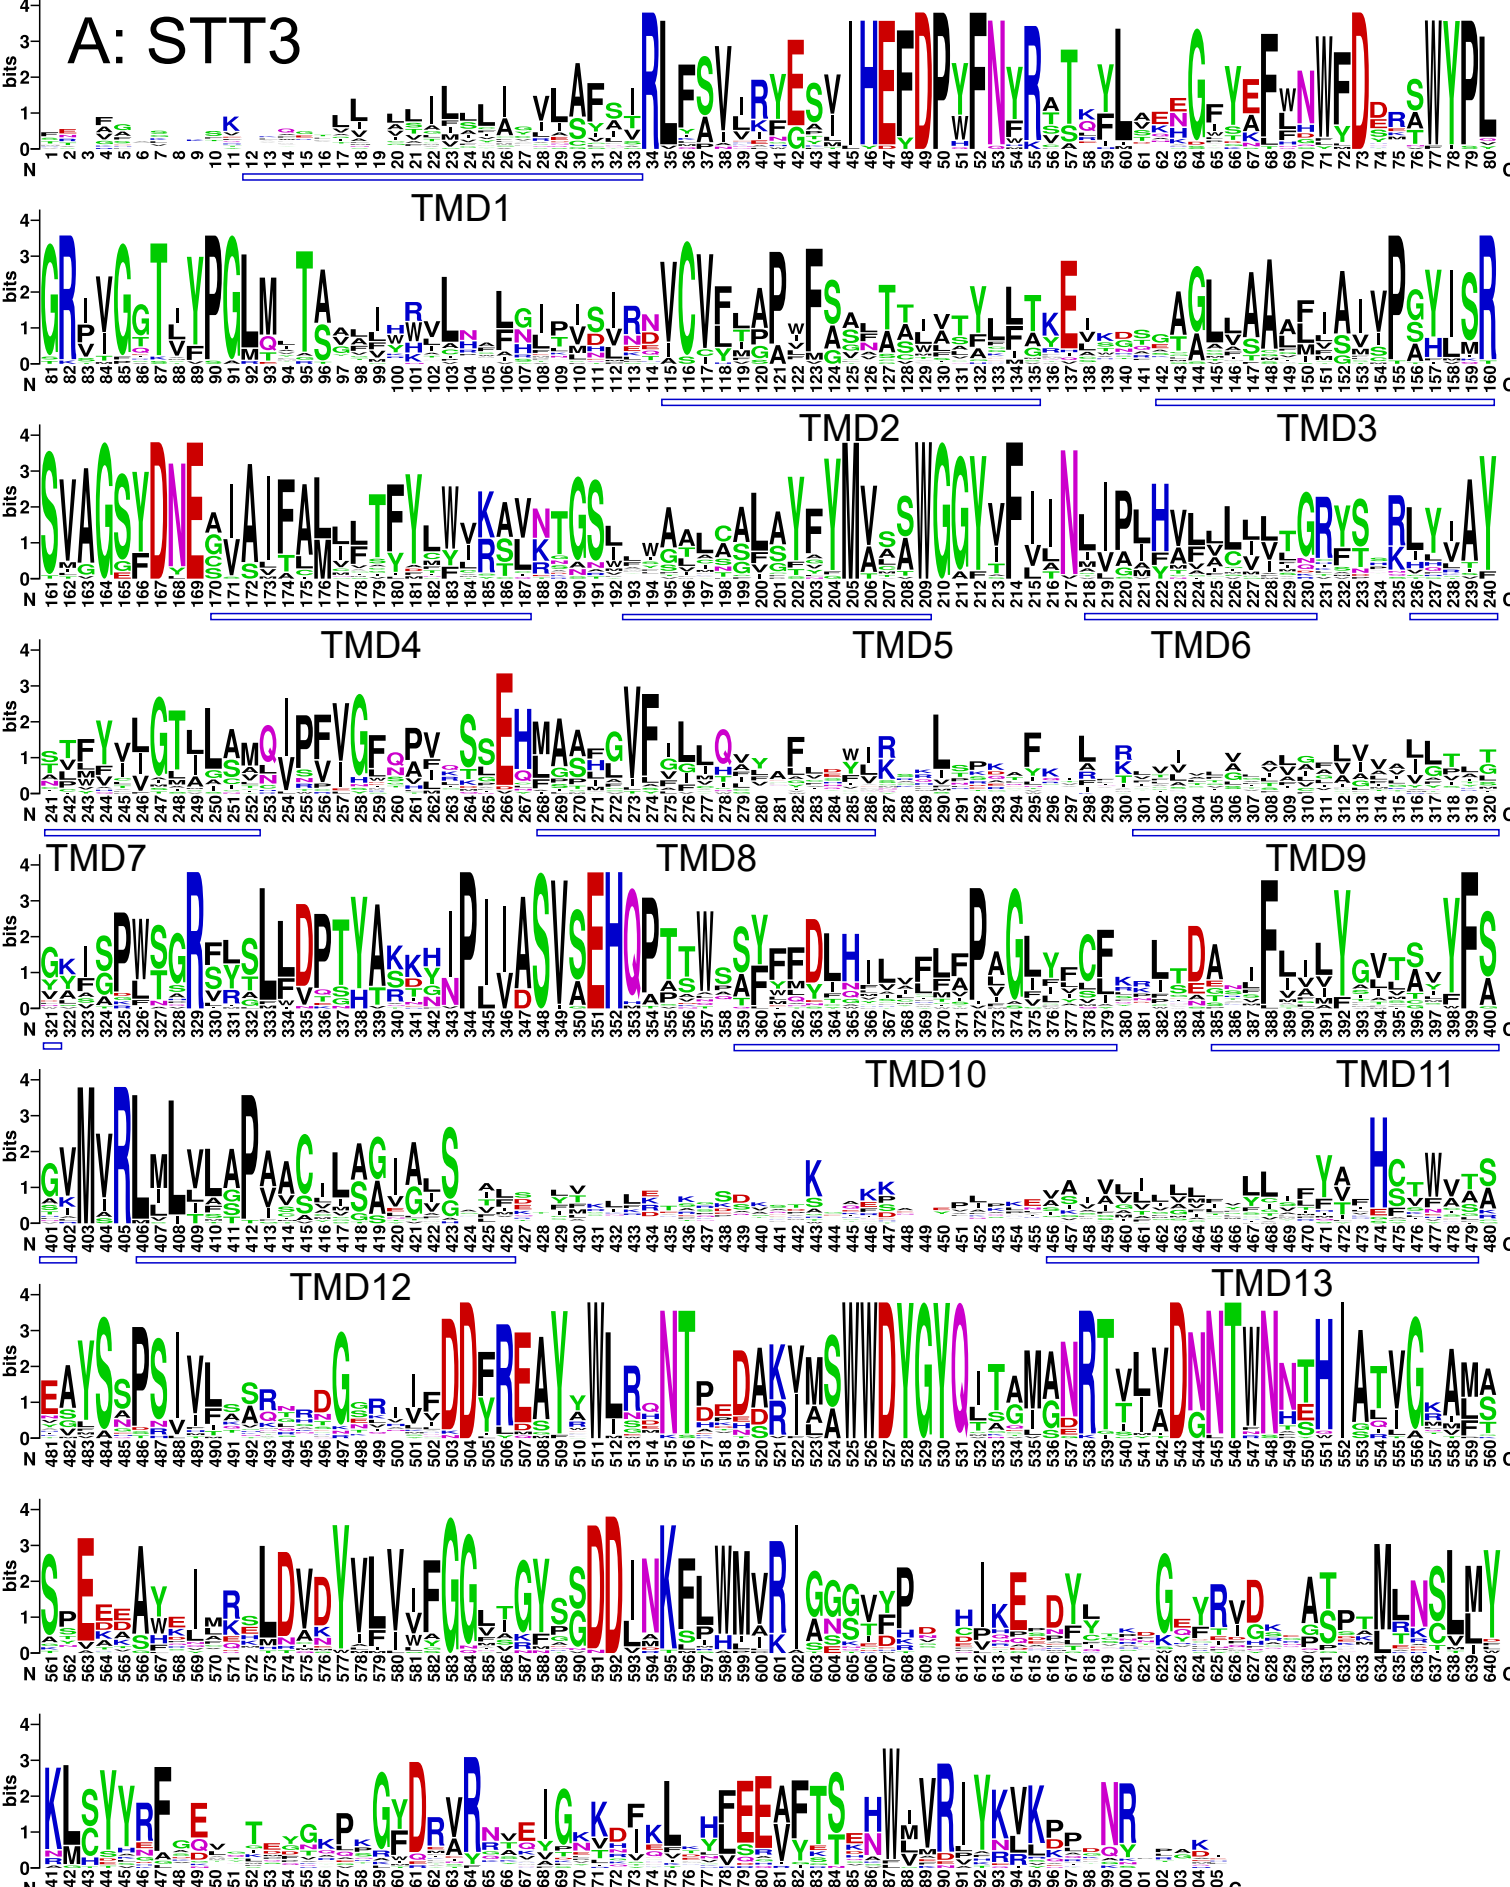

# B: DPY19

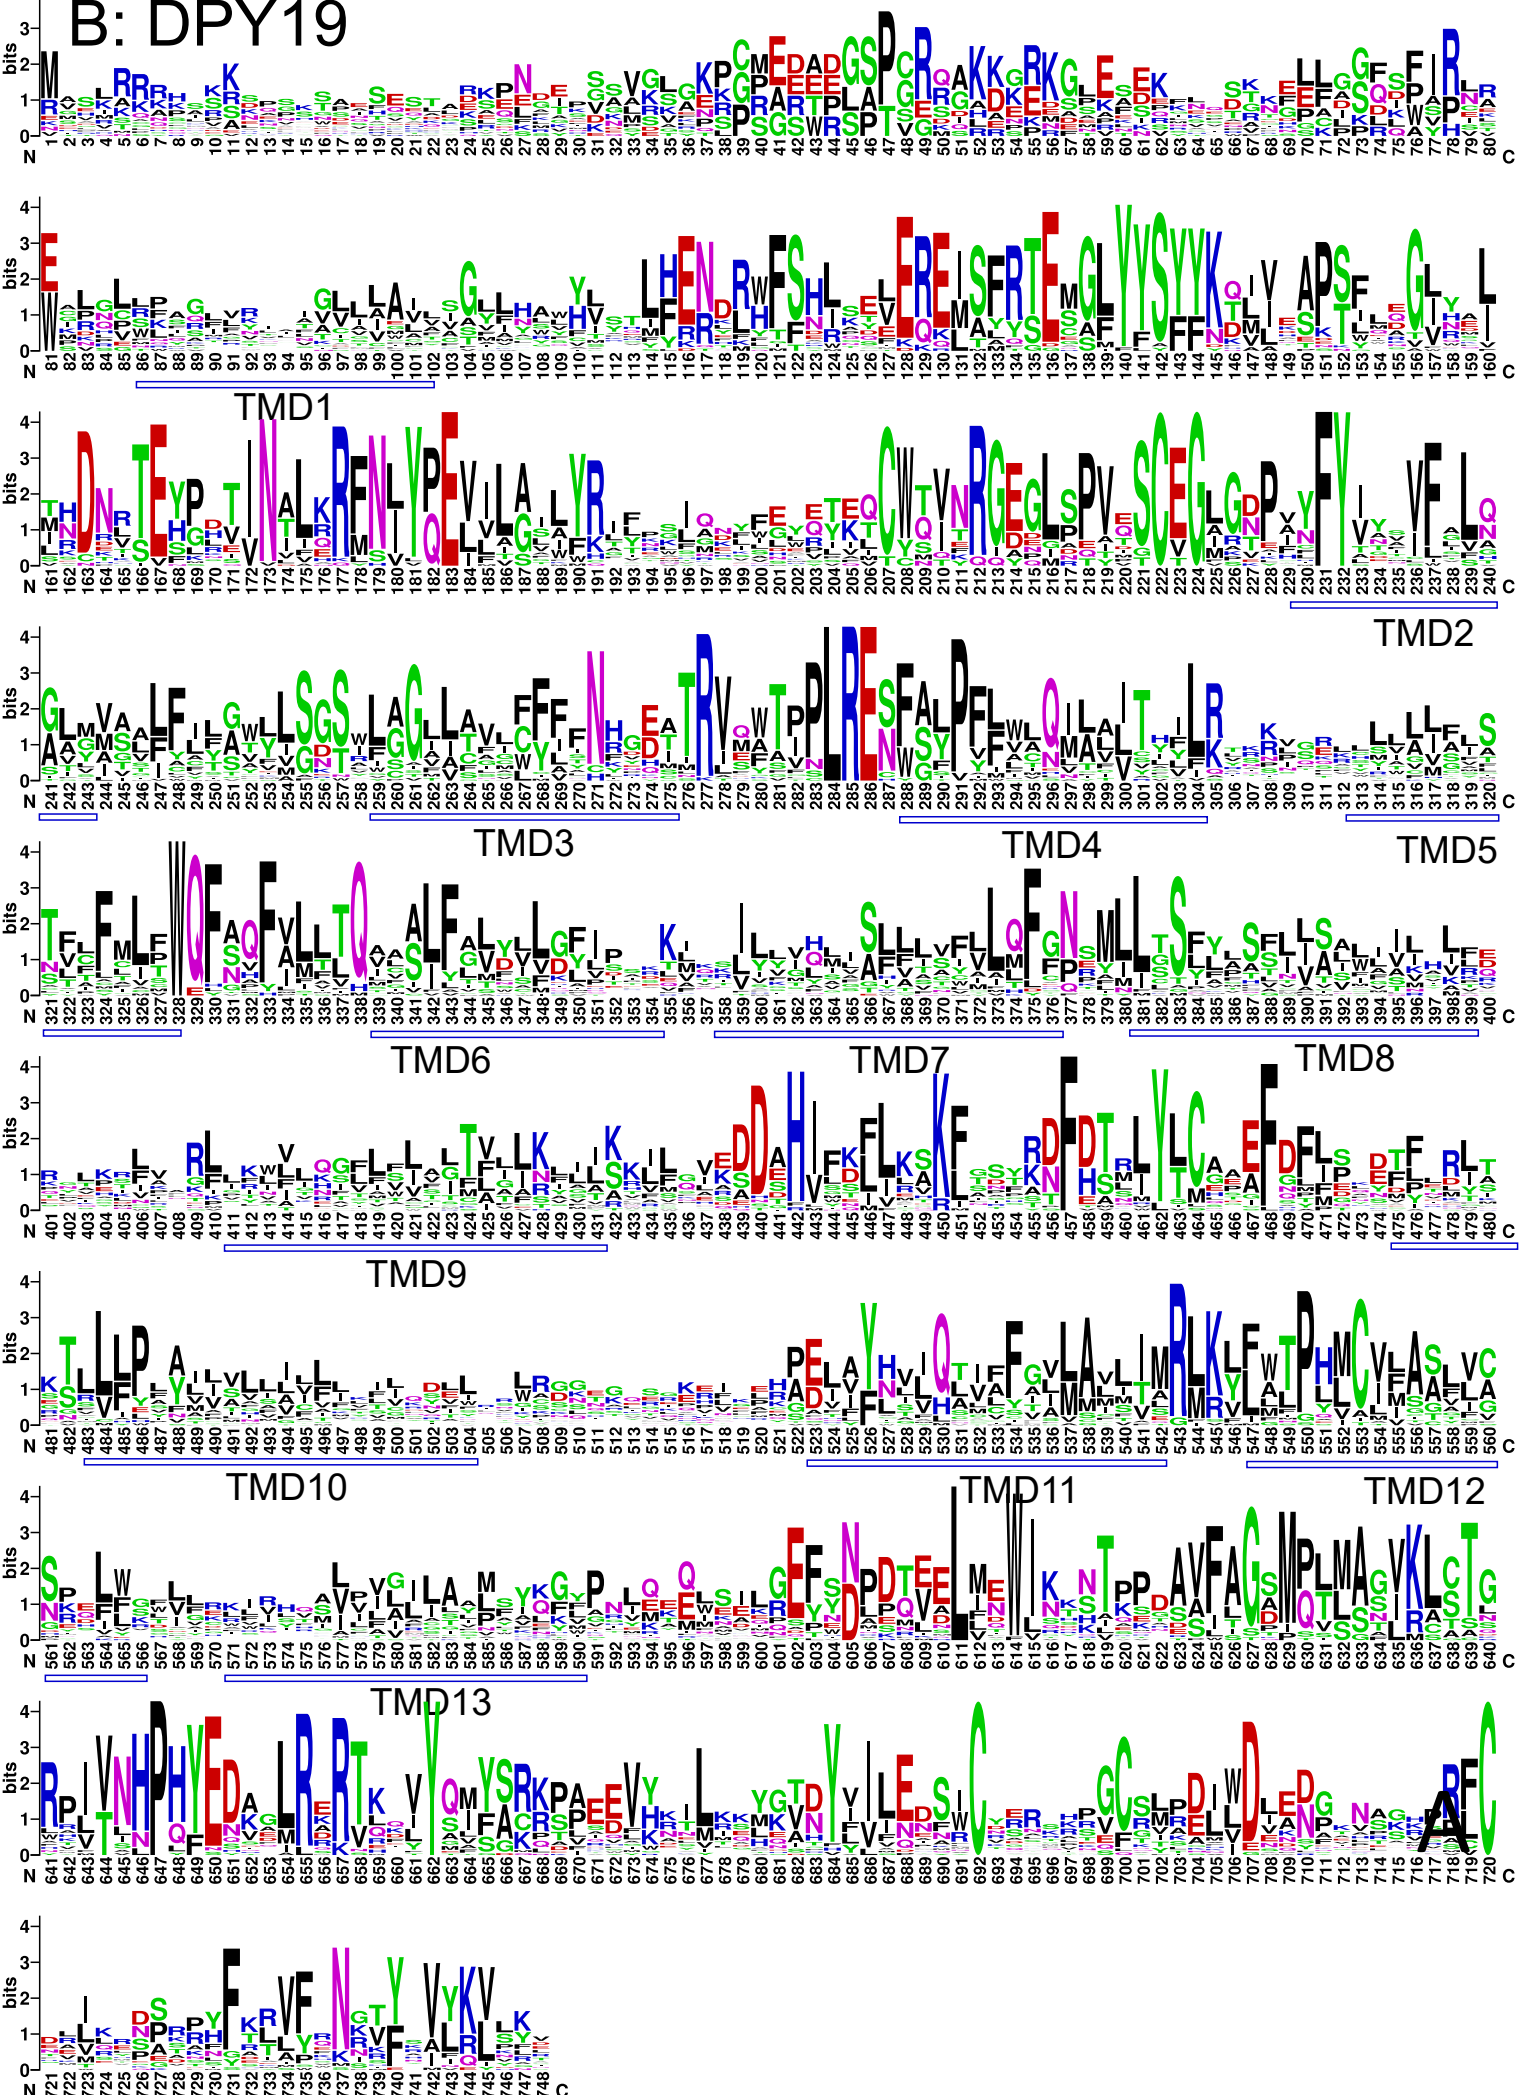

# C: POMT

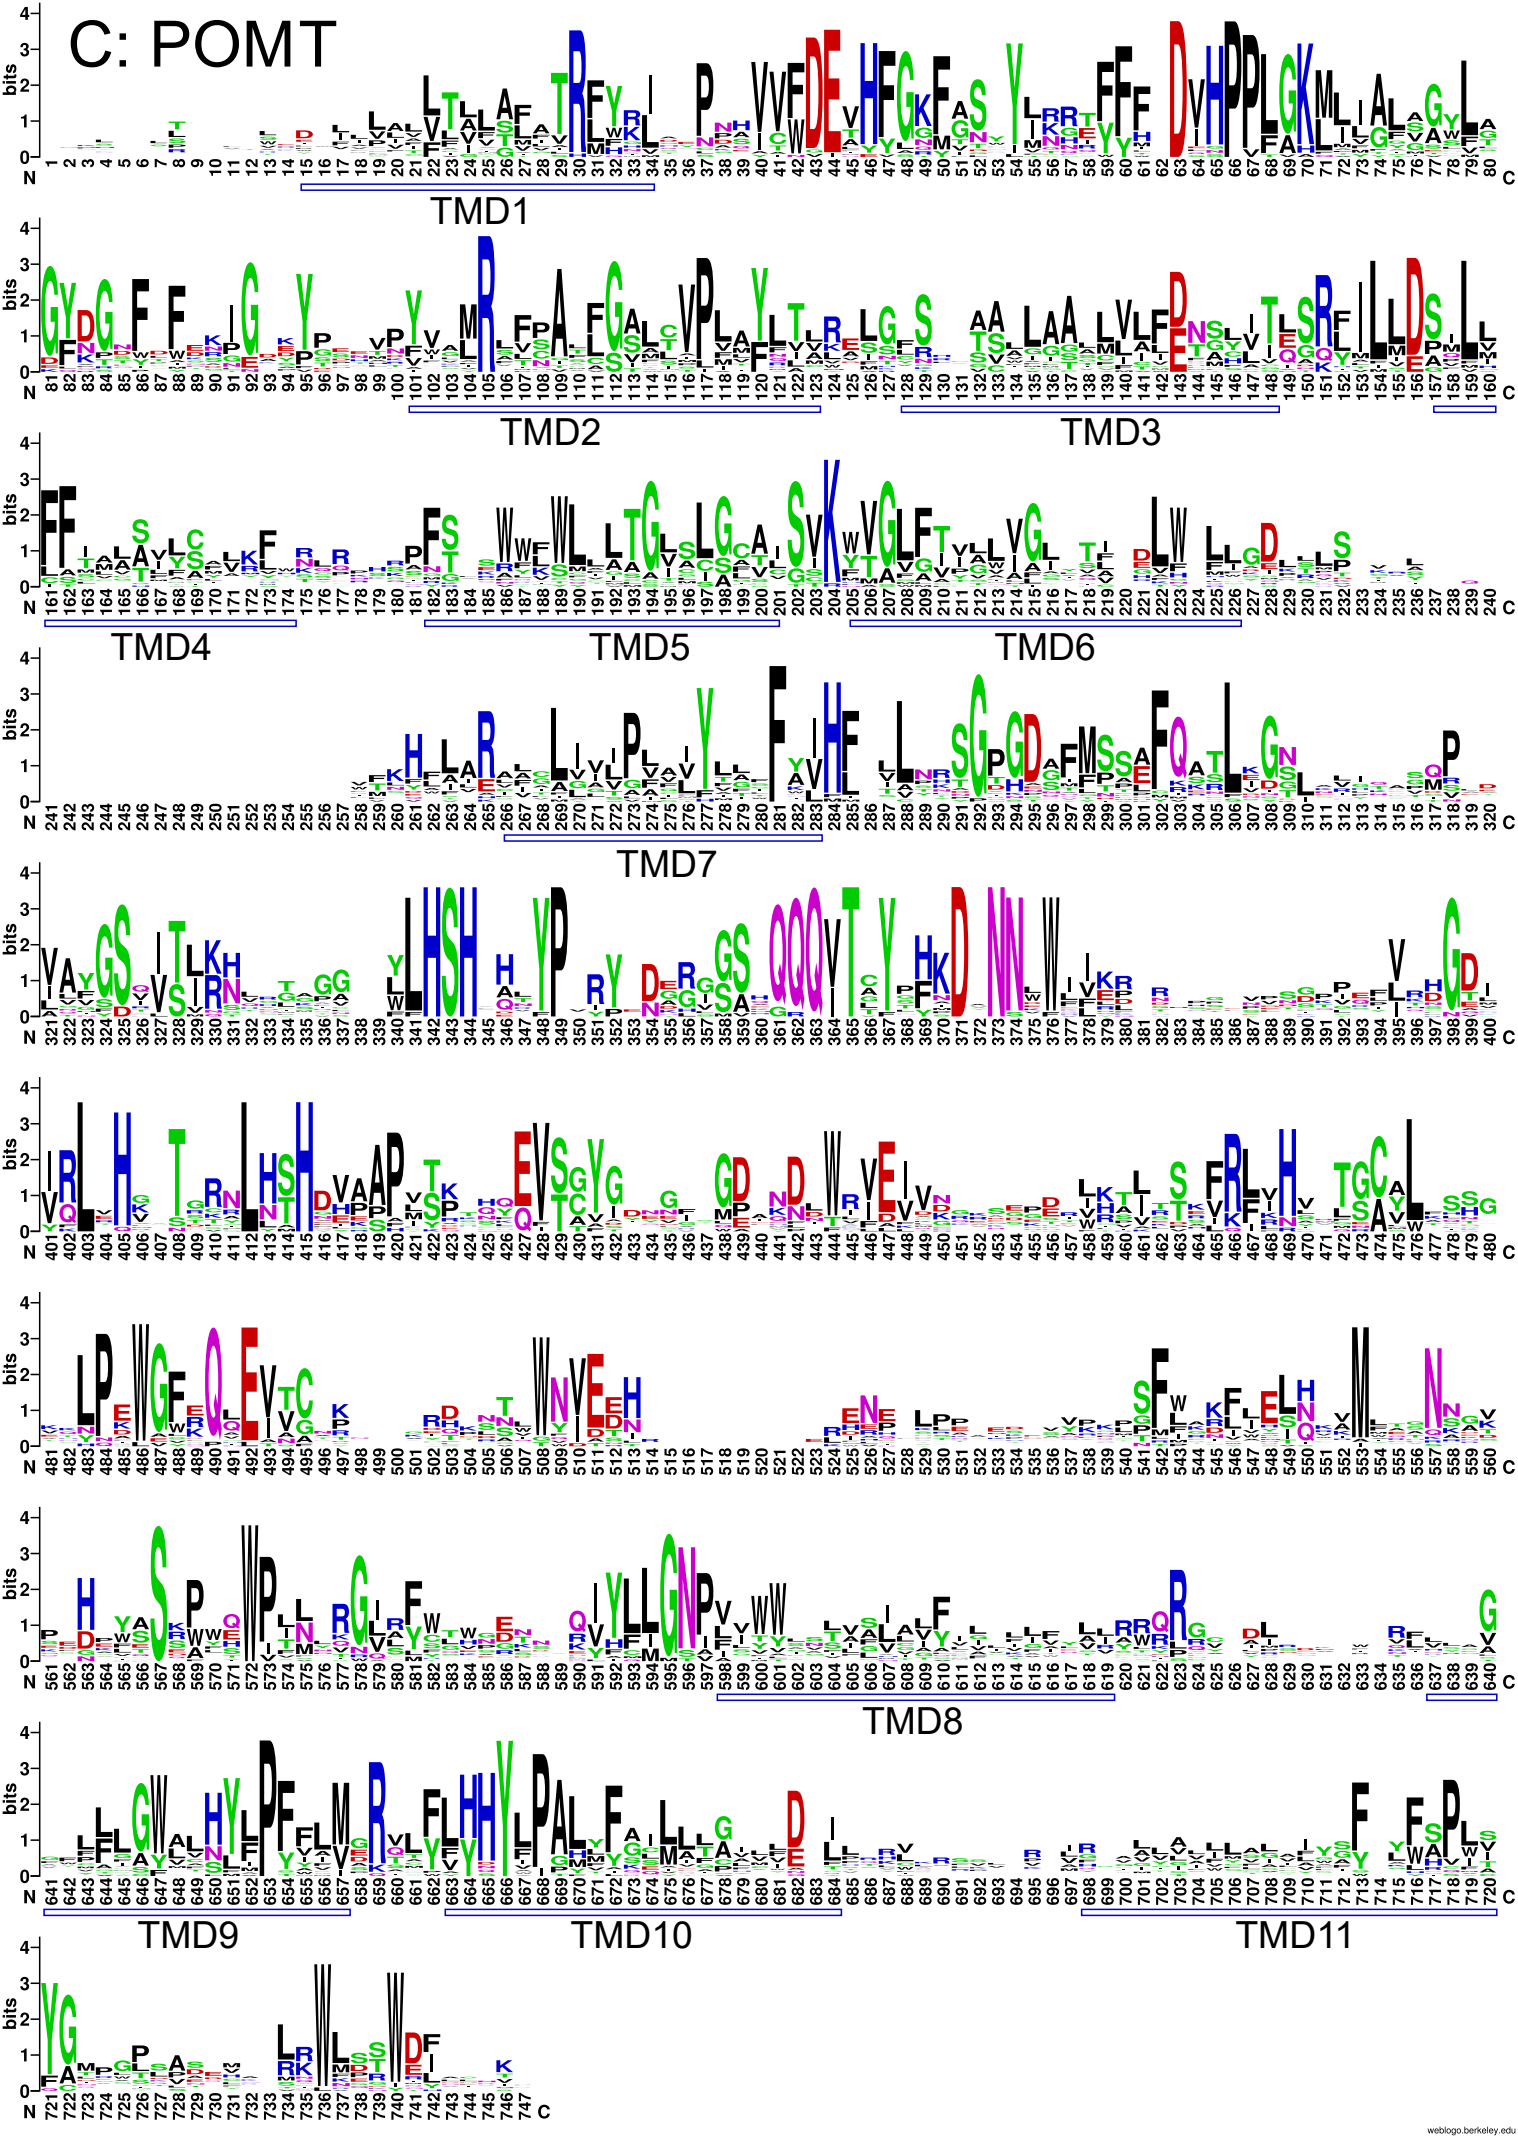



# E: ALG12

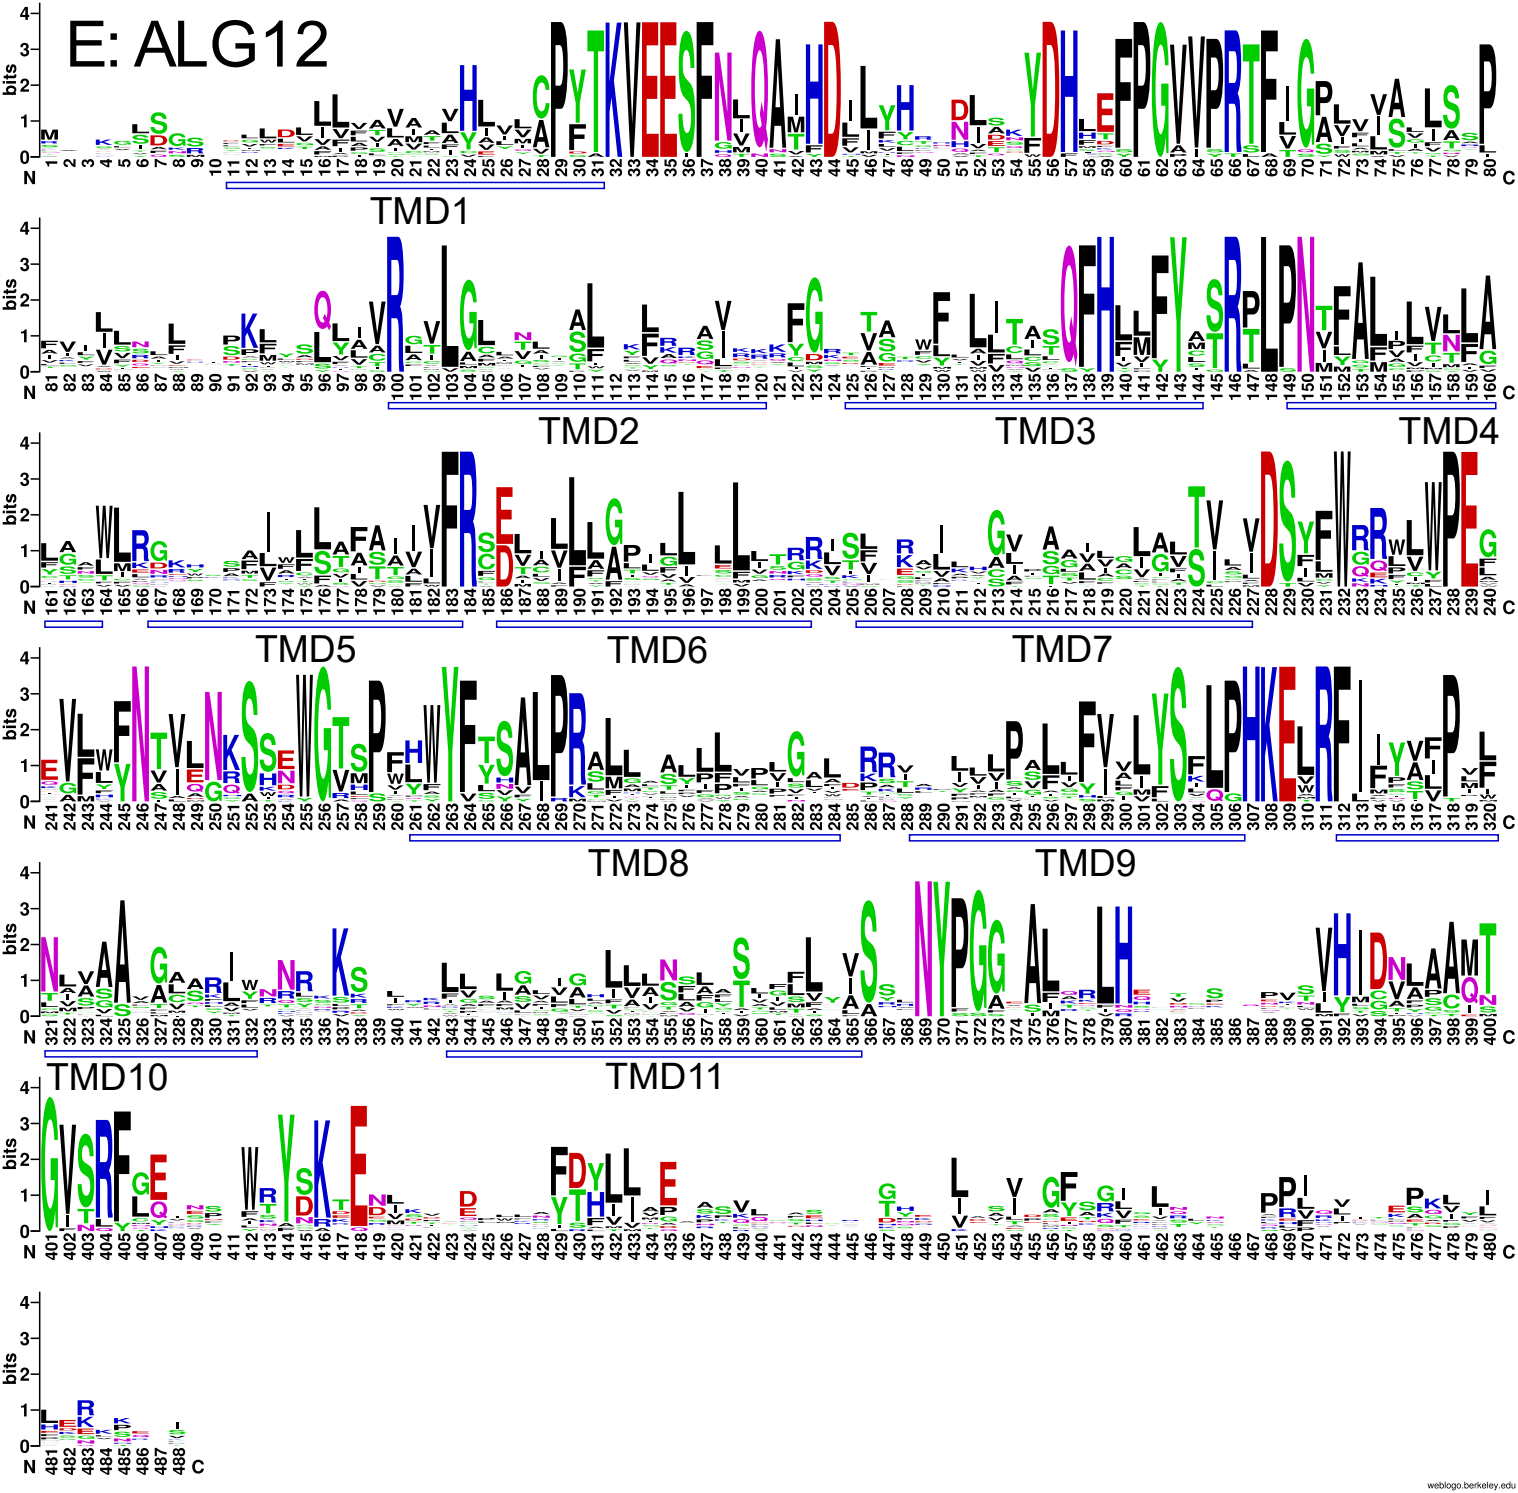

# F: ALG9

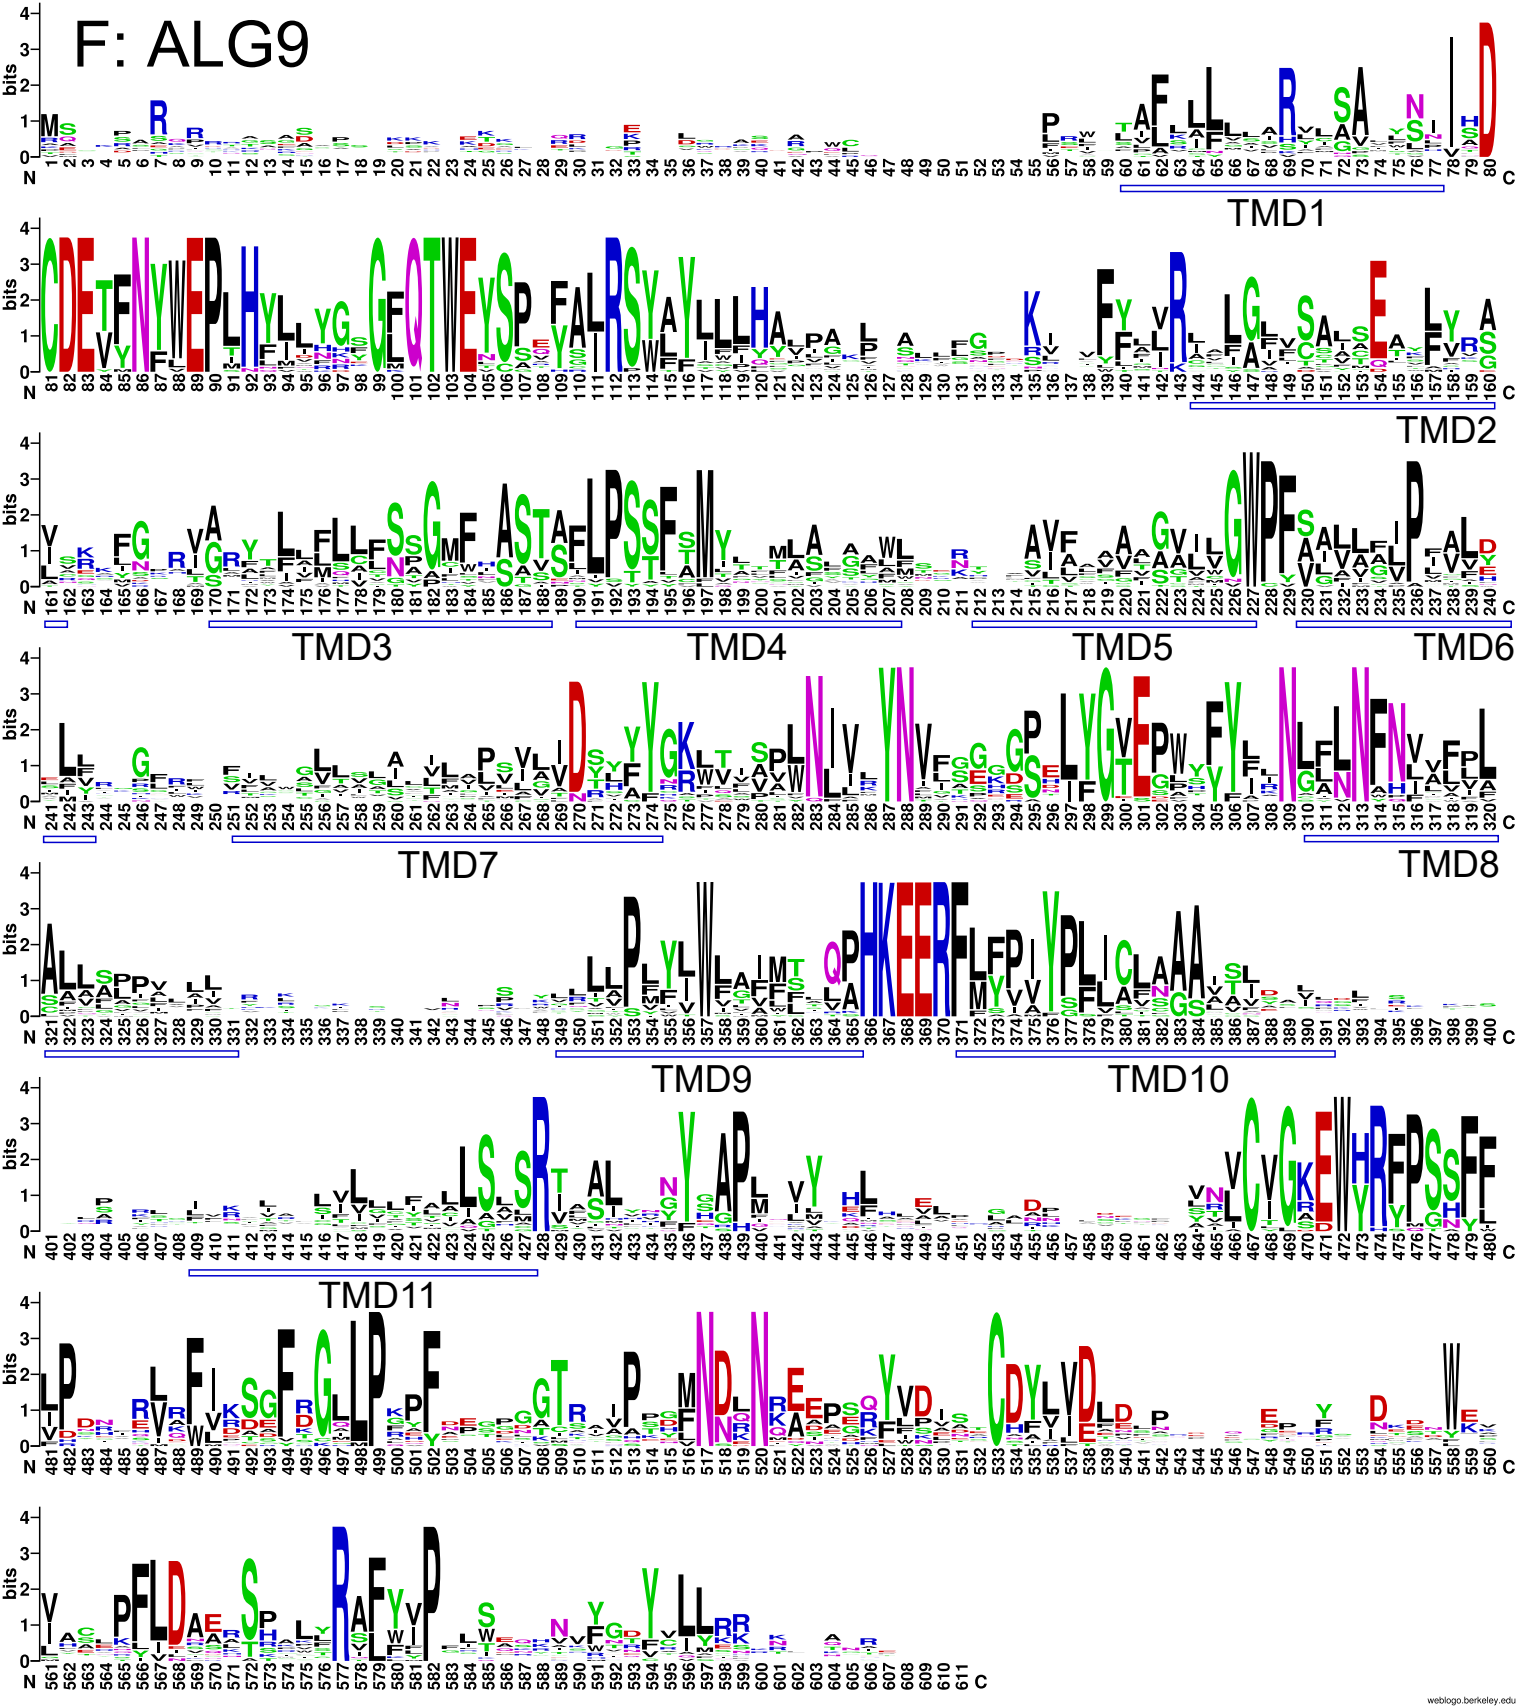

# G: PIGB

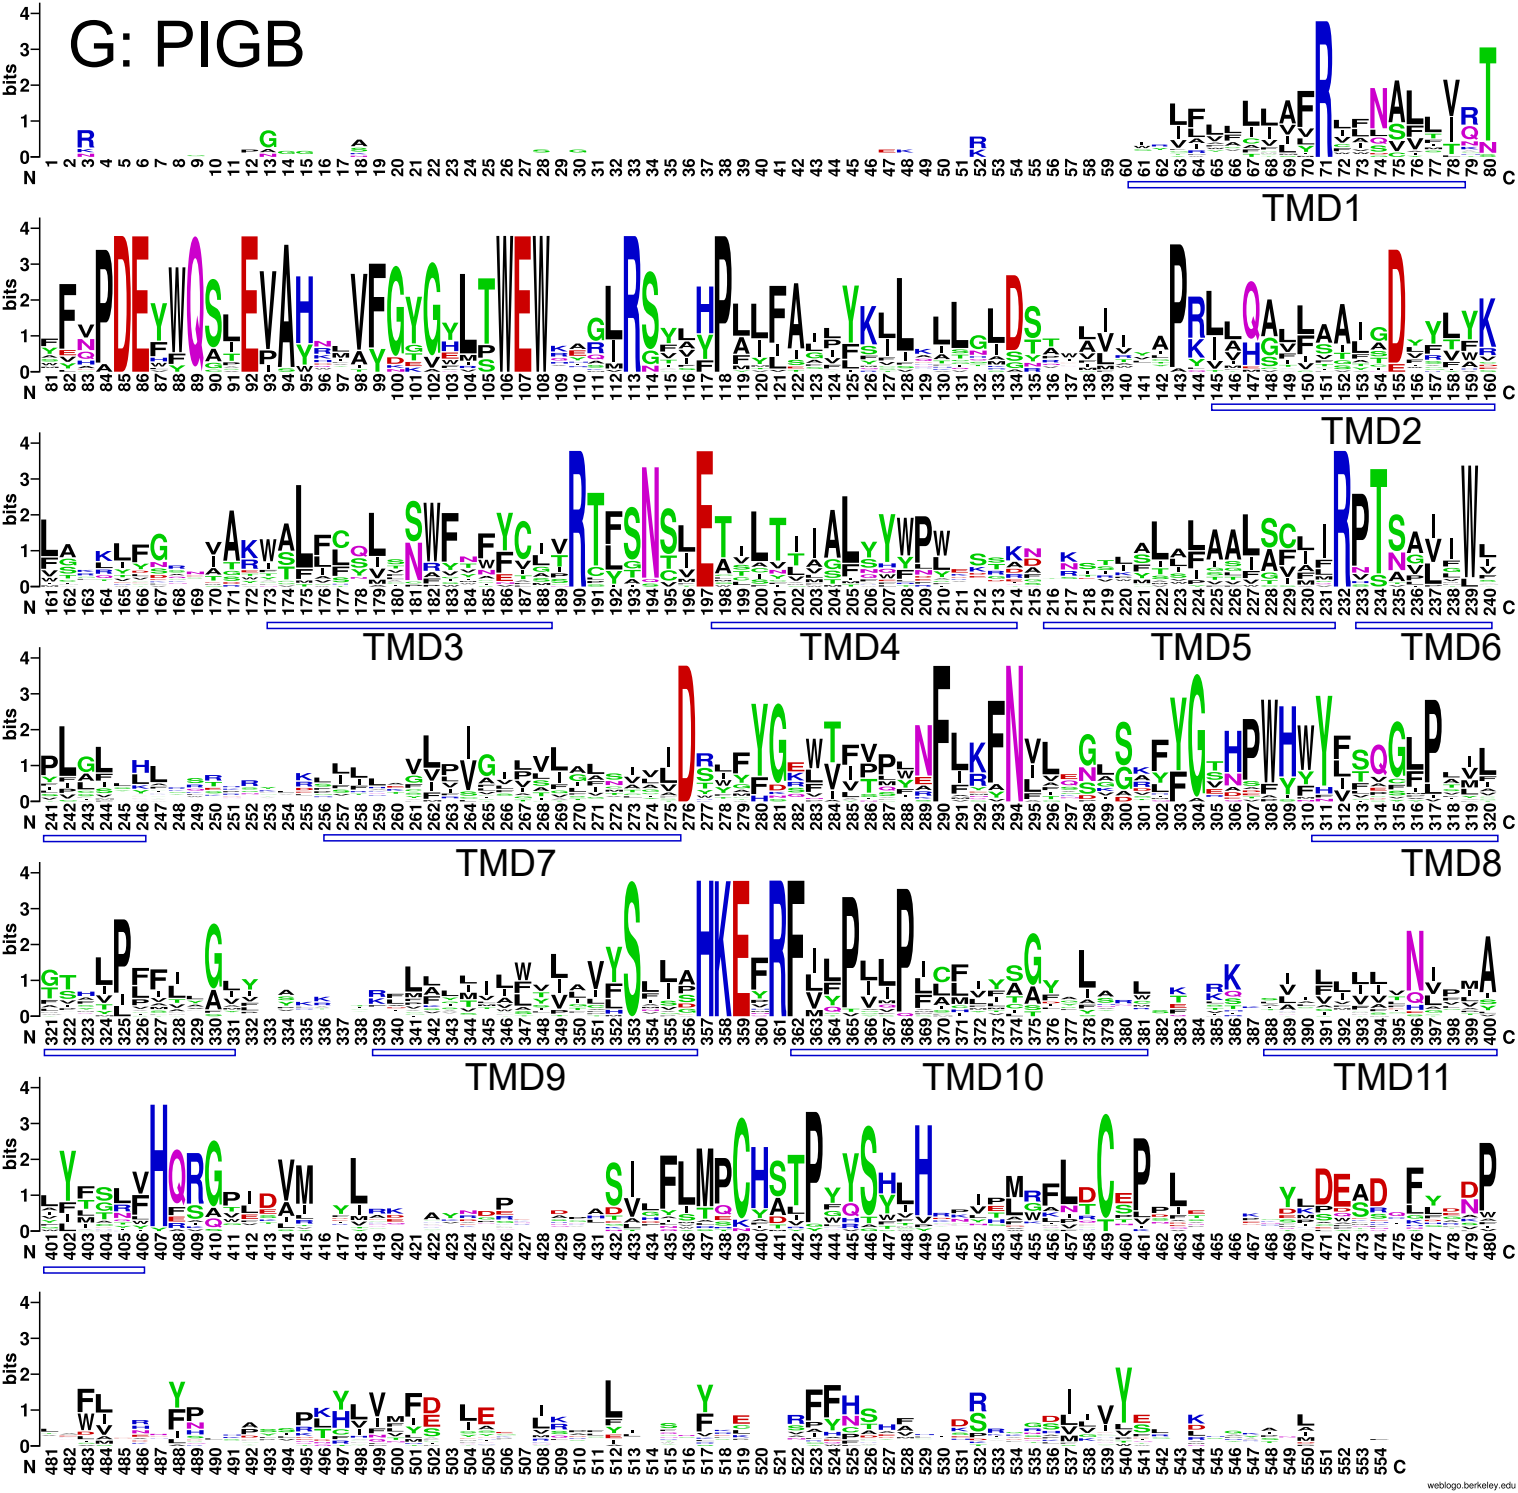





# I: PIGV

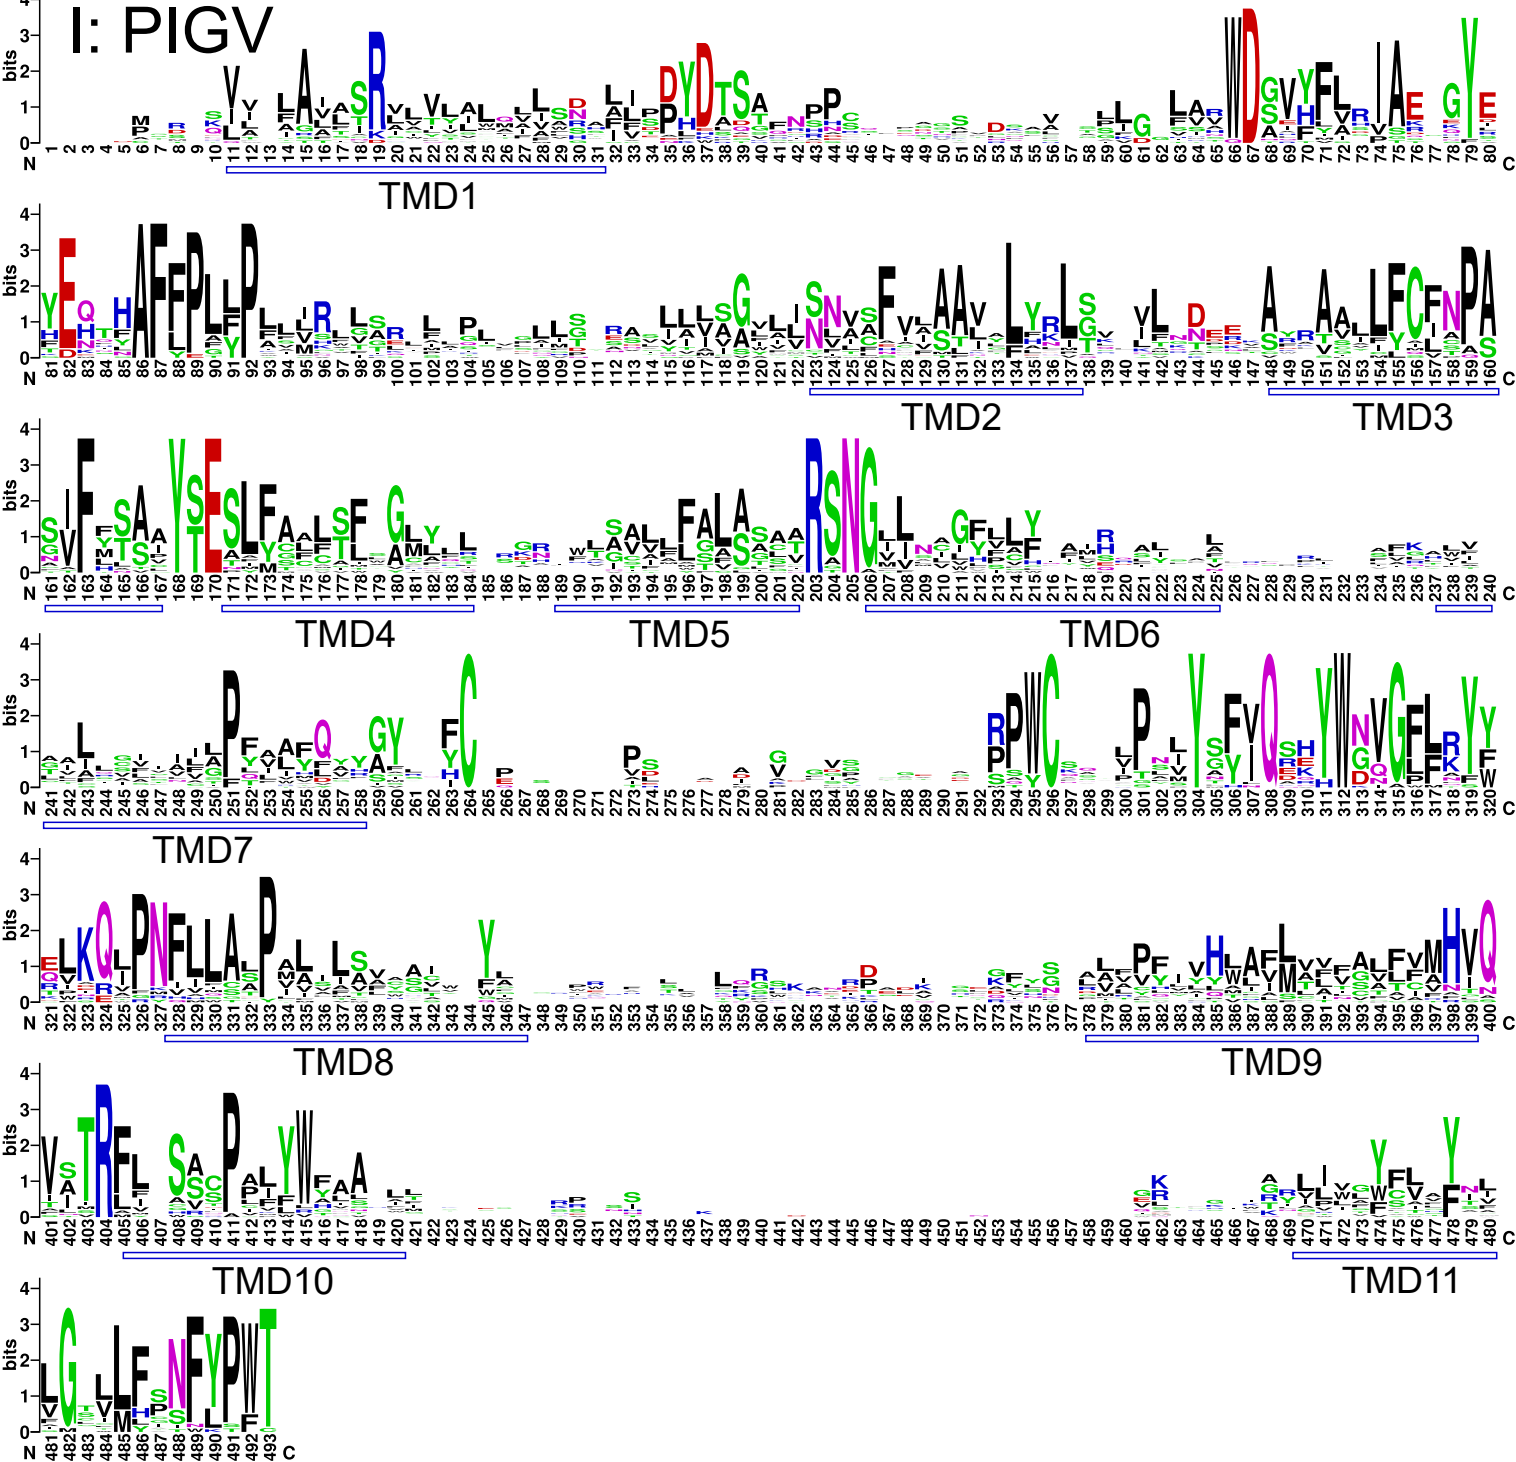

# J: ALG3

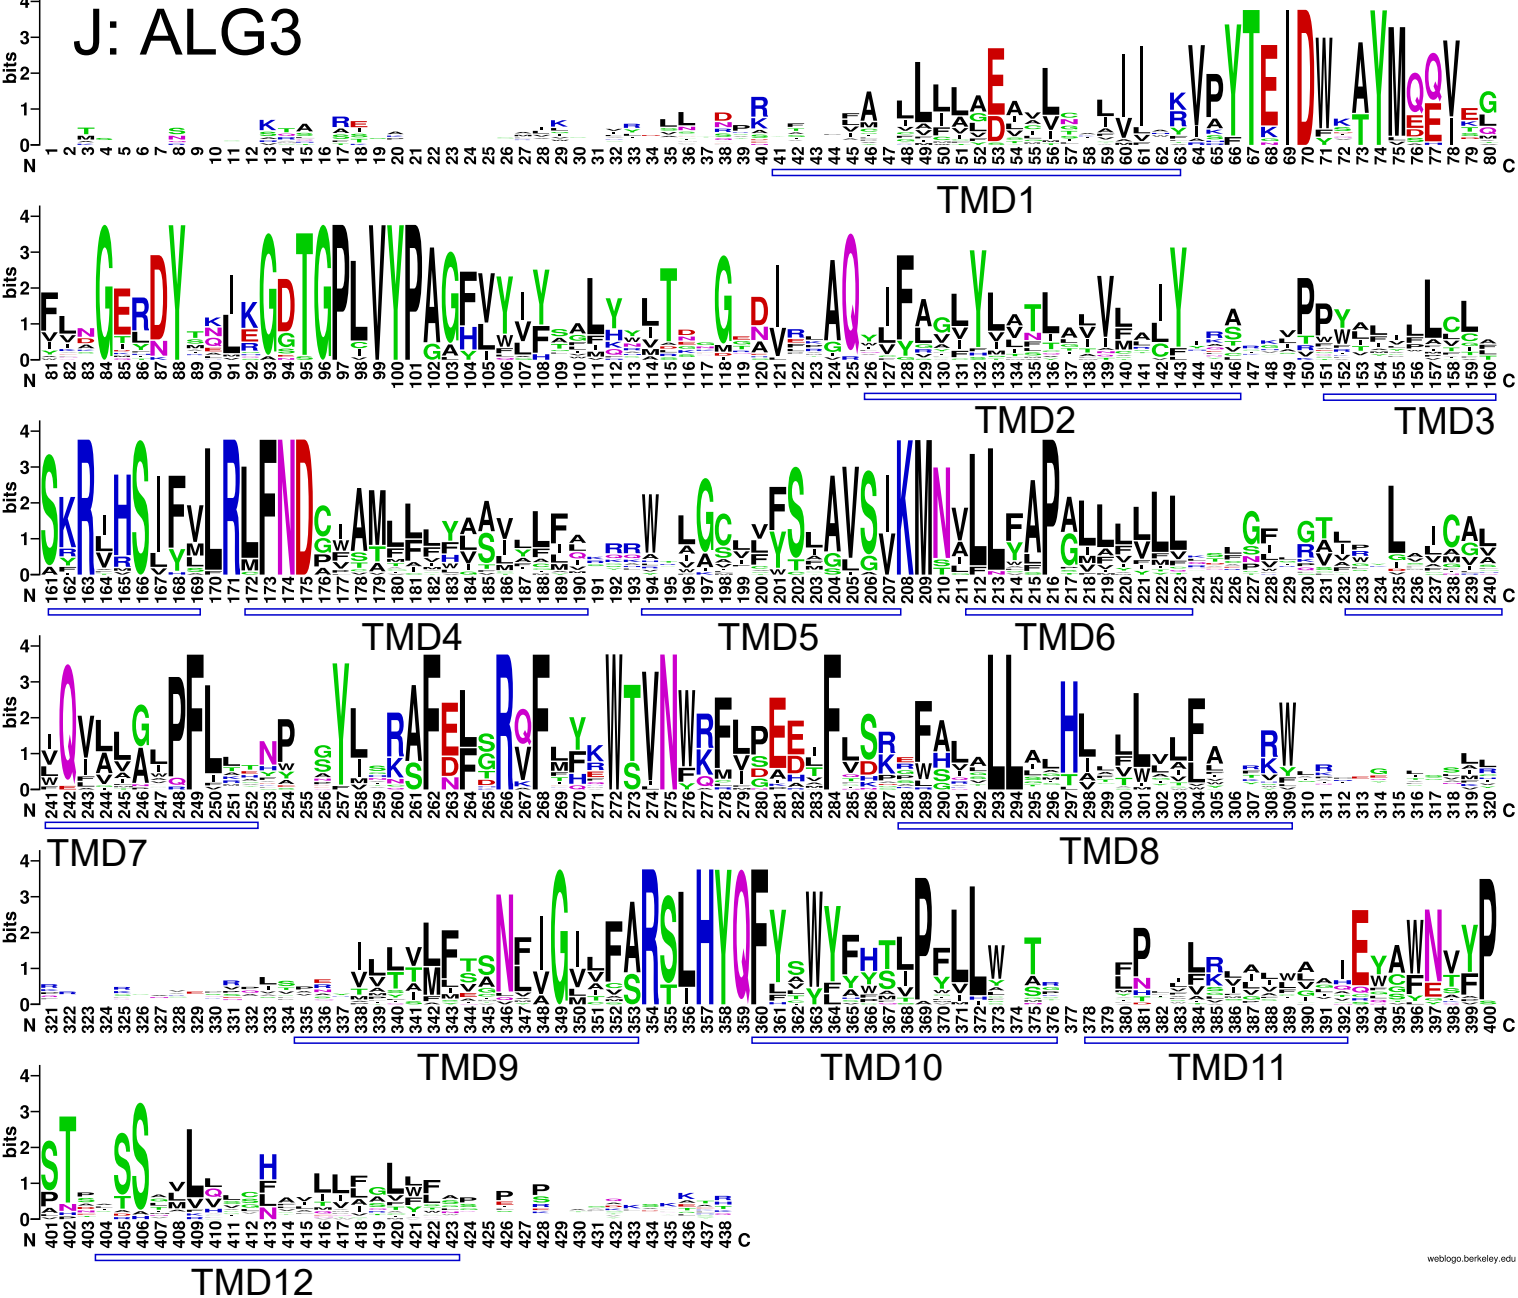

# K: PIGM

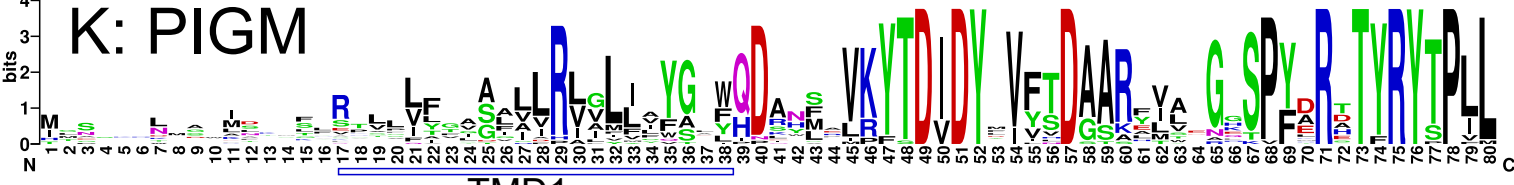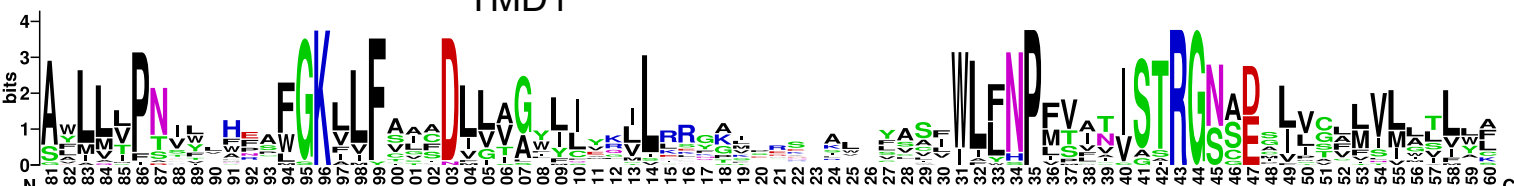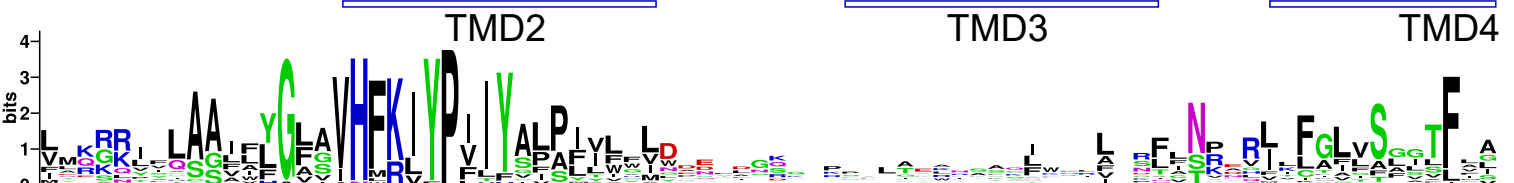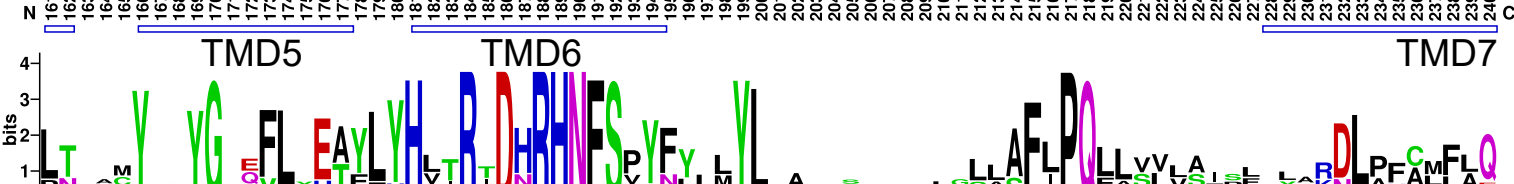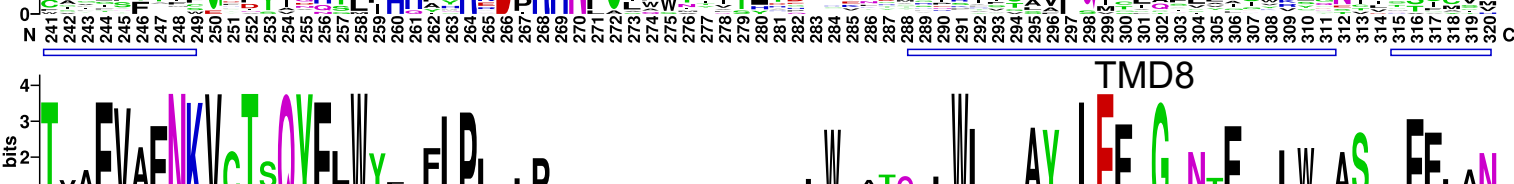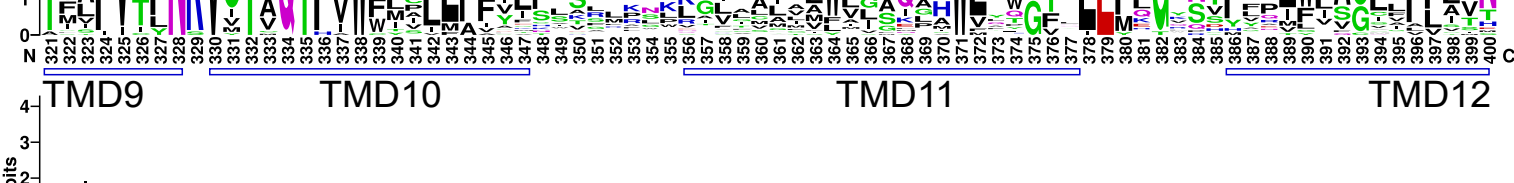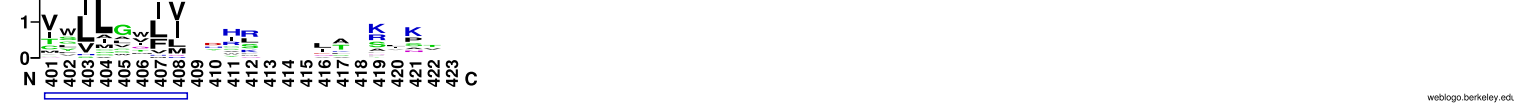

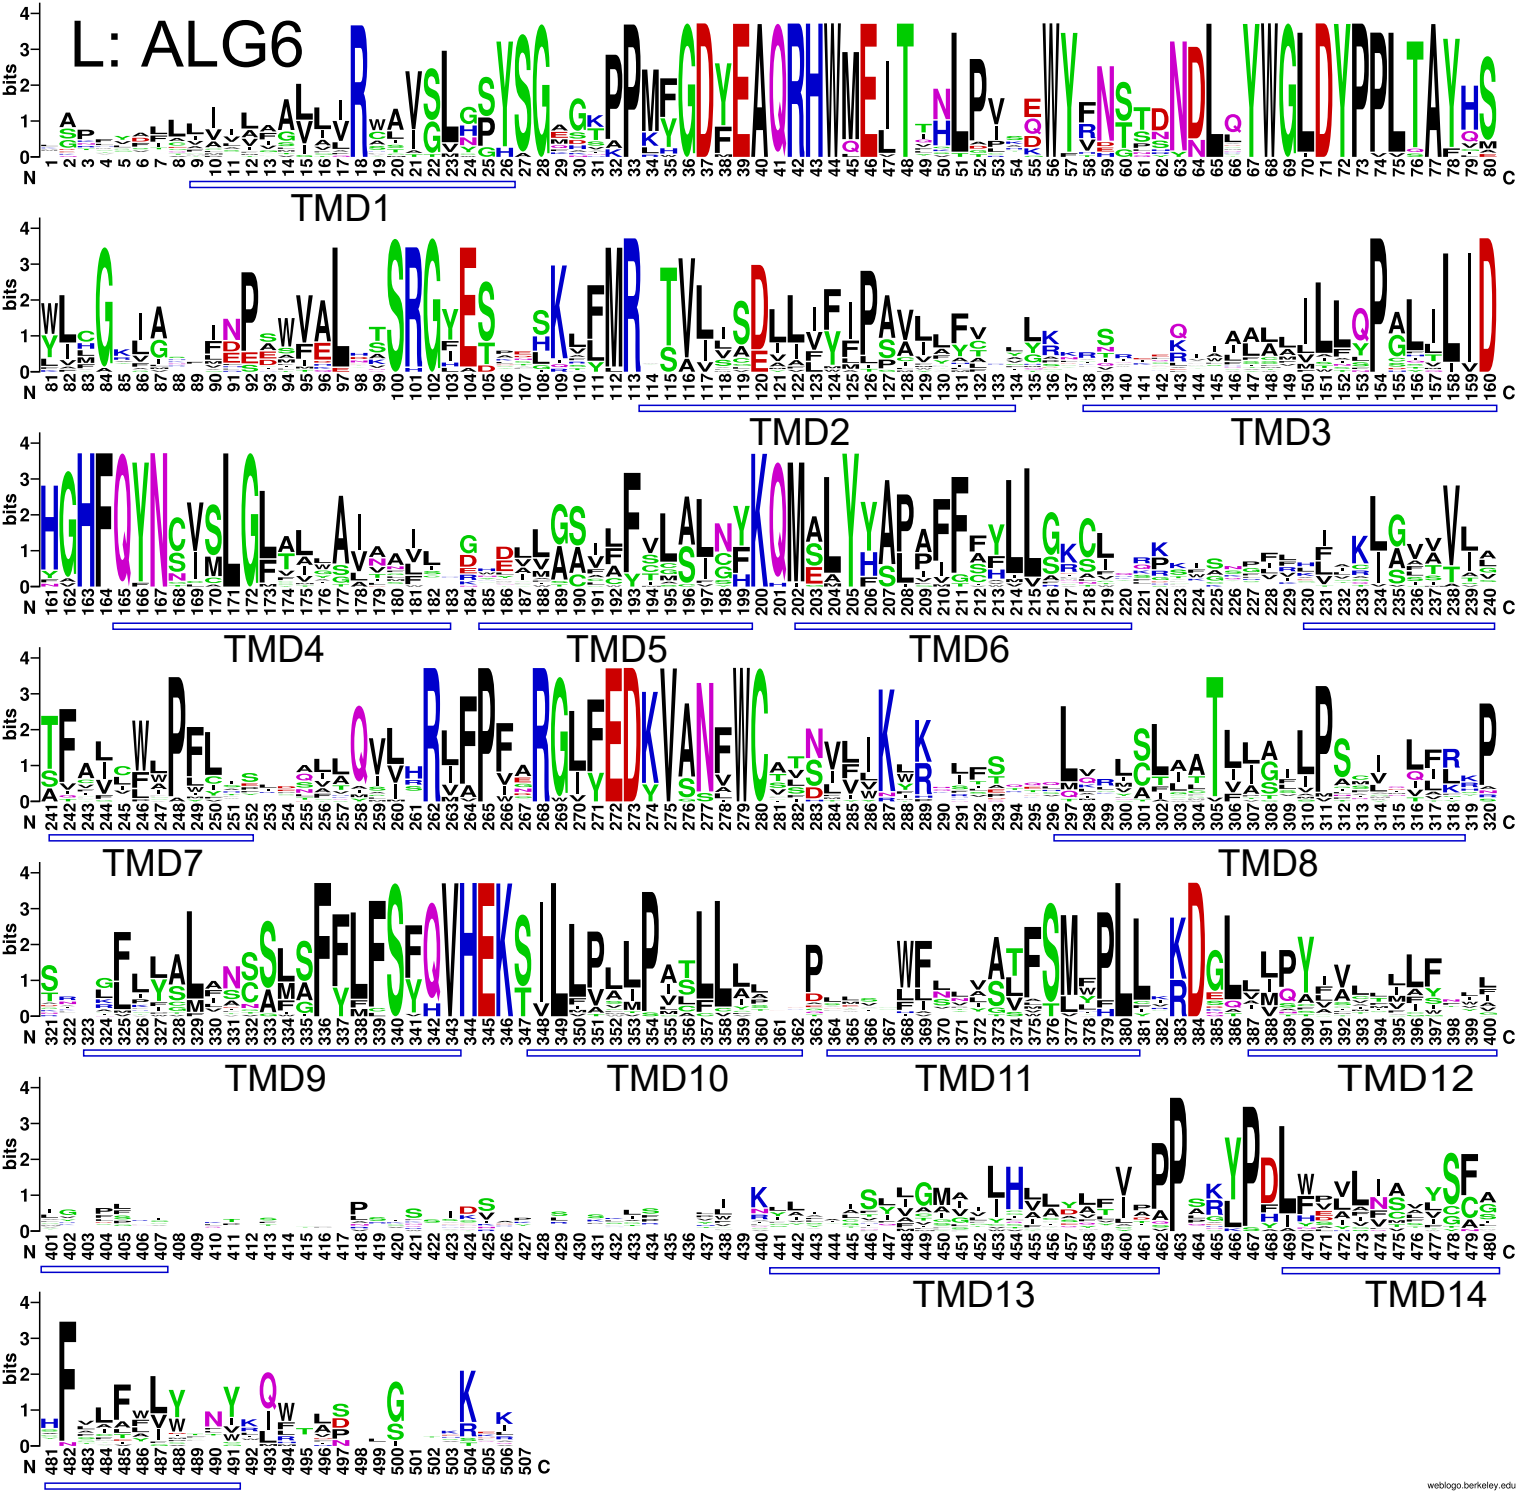

# M: ALG8

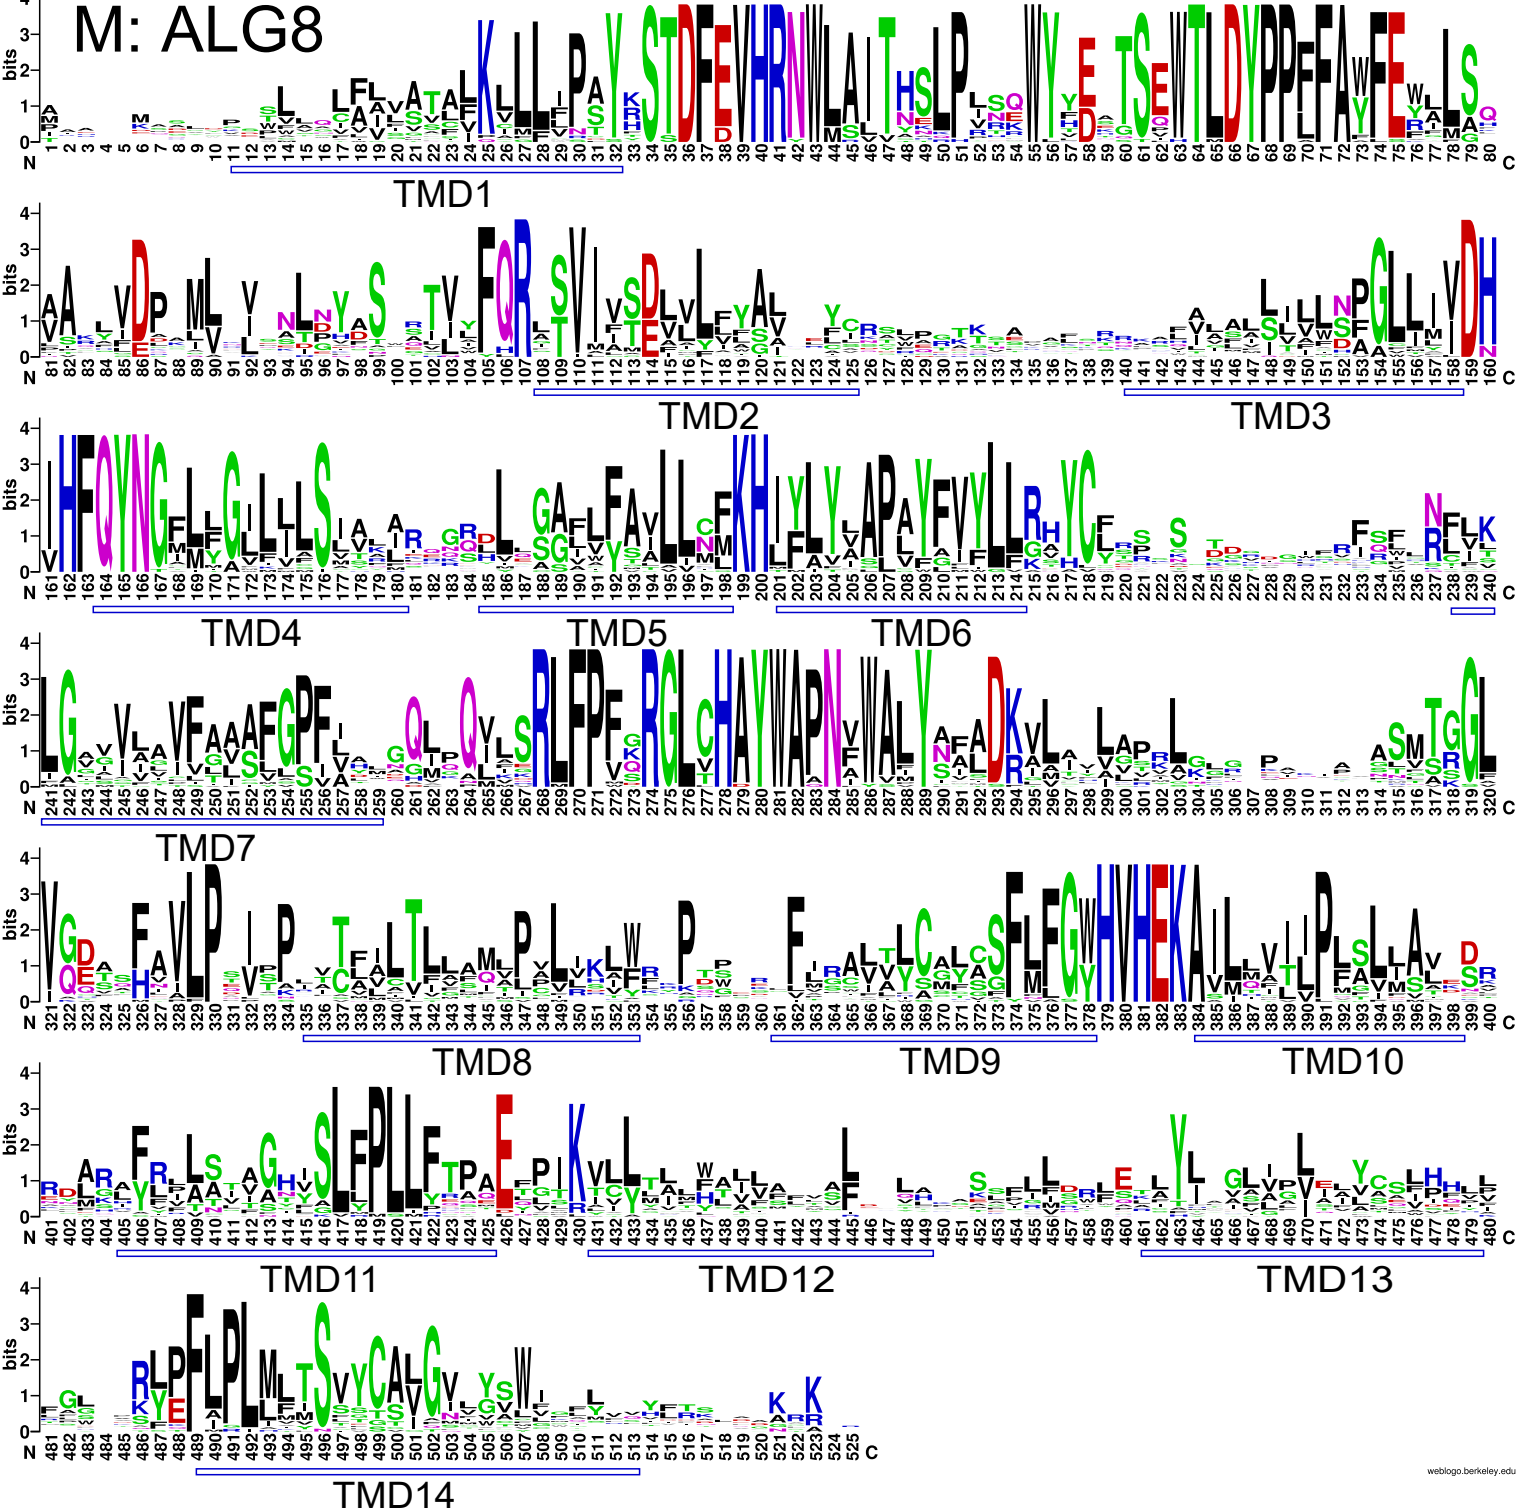



# O: DPAGT1

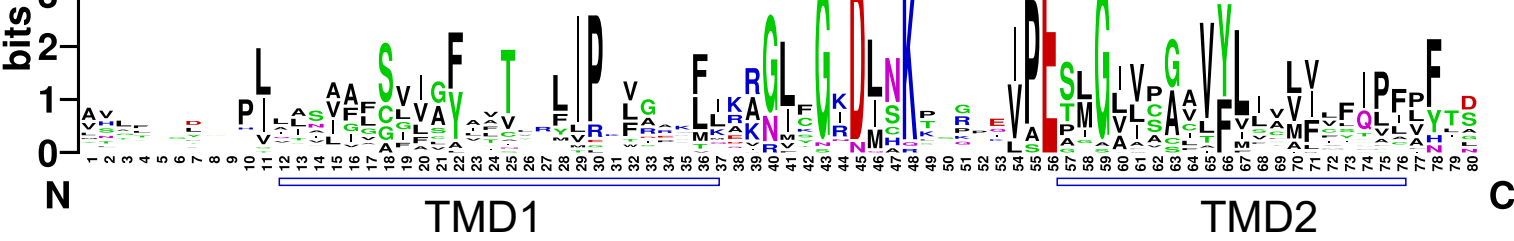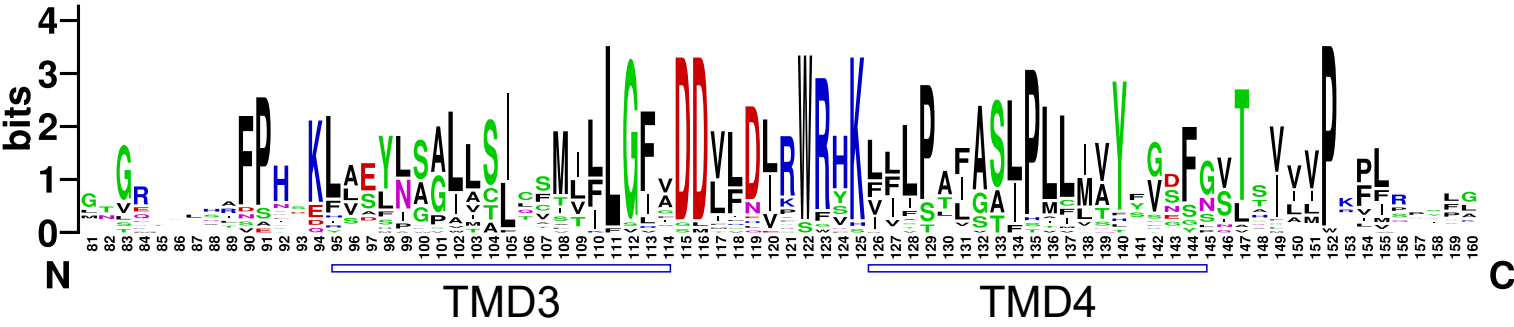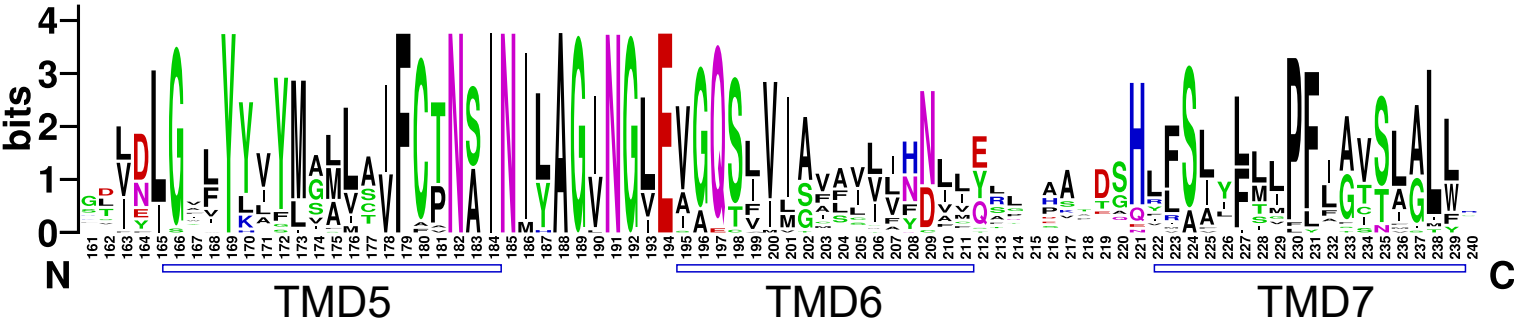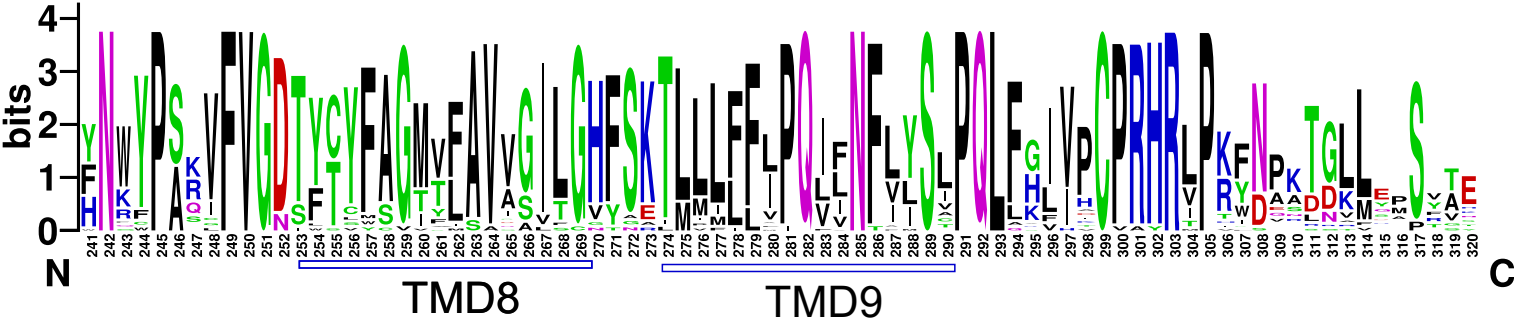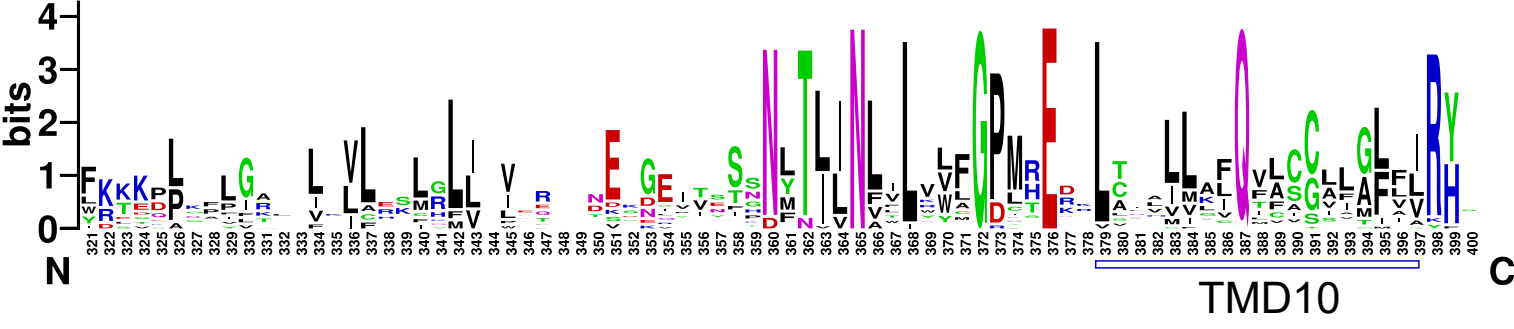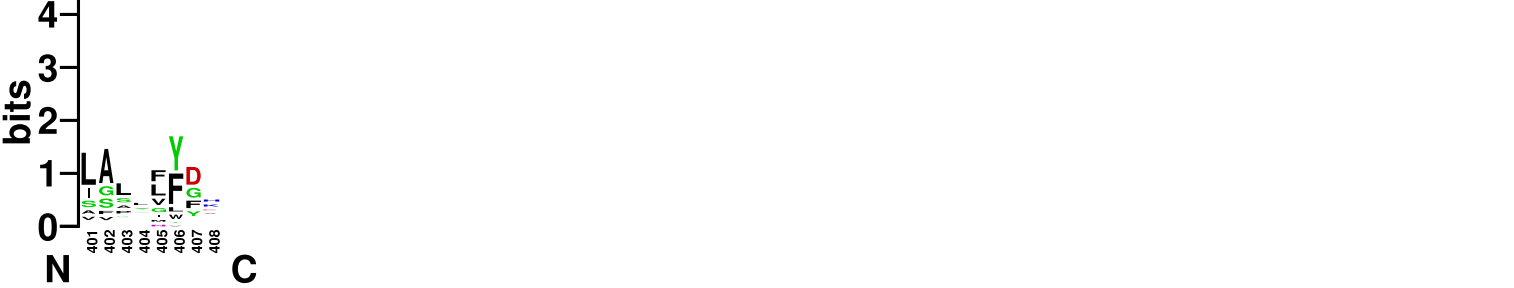

Supplement: ijms-20-04842-s001.pdf [file ijms-20-04842-s001.pdf]
